# Supplementary material for: Hepatic Transcriptome Analysis Identifies Divergent Pathogen-Specific Targeting-Strategies to Modulate the Innate Immune System in Response to Intramammary Infection
Source: Front Immunol. 2020 Apr 29;11:715. doi: 10.3389/fimmu.2020.00715 (PMC7202451; doi:10.3389/fimmu.2020.00715)
Supplement: Supplementary file 20 [file Table_11.xlsx]

## Sheet: Signaling by Rho Family GTPases
Supplementary Table 11: Downregulation of of genes involved in Signaling by Rho Family GTPases and RhoGDI Signaling pathways the liver of cows in response to intramammary S. aureus challenge compared to non-challenged controls
Gene Symbol	log2FoldChange	padj
MYL9	-0.994	1.16e-09
CDH5	-1.287	4.41e-09
LIMK1	-1.153	7.8e-07
GNB1	-0.437	2.26e-06
EZR	-0.893	6.53e-06
PI4KA	-0.554	1.68e-05
GNAI2	-0.659	4.94e-05
GNA12	-0.669	5.07e-05
RHOG	-0.728	0.000208
ACTB	-0.673	0.00108
MSN	-0.593	0.00108
PIK3R5	-0.738	0.00116
CFL1	-0.443	0.0012
DES	-0.494	0.00186
CDH15	-1.271	0.00366
NFKB2	-0.563	0.00401
ARPC1B	-0.693	0.00409
SLC9A1	-0.434	0.00477
ARHGEF17	-0.477	0.0054
ARHGEF7	-0.478	0.00561
MAPK1	-0.29	0.00581
FGFR1	-0.436	0.00652
GNB2	-0.552	0.00718
ARPC1A	-0.273	0.00792
GNG7	-0.444	0.0101
ACTA2	-0.9	0.0113
MAP3K11	-0.582	0.0143
SEPT6	-0.496	0.0222
IRS1	-0.572	0.0226
PIP4K2A	-0.322	0.0232
MAP2K7	-0.371	0.0249
VIM	-0.435	0.0258
RHOC	-0.388	0.0259
PIP5K1C	-0.379	0.0262
ARHGEF6	0.319	0.0326
ARHGEF10	-0.557	0.0343
ARHGEF15	-0.493	0.0378
ITGA5	0.735	0.0423
MAP3K10	-0.432	0.0481
WASF1	0.904	0.0486
